# Supplementary material
Source: PubMed Central journal article supplement (PMC2840096)
Supplement: 1000621107_pnas.201000621SI.pdf [file 1000621107_pnas.201000621SI.pdf]

# Supporting Information

Nchinda et al. 10.1073/pnas.1000621107

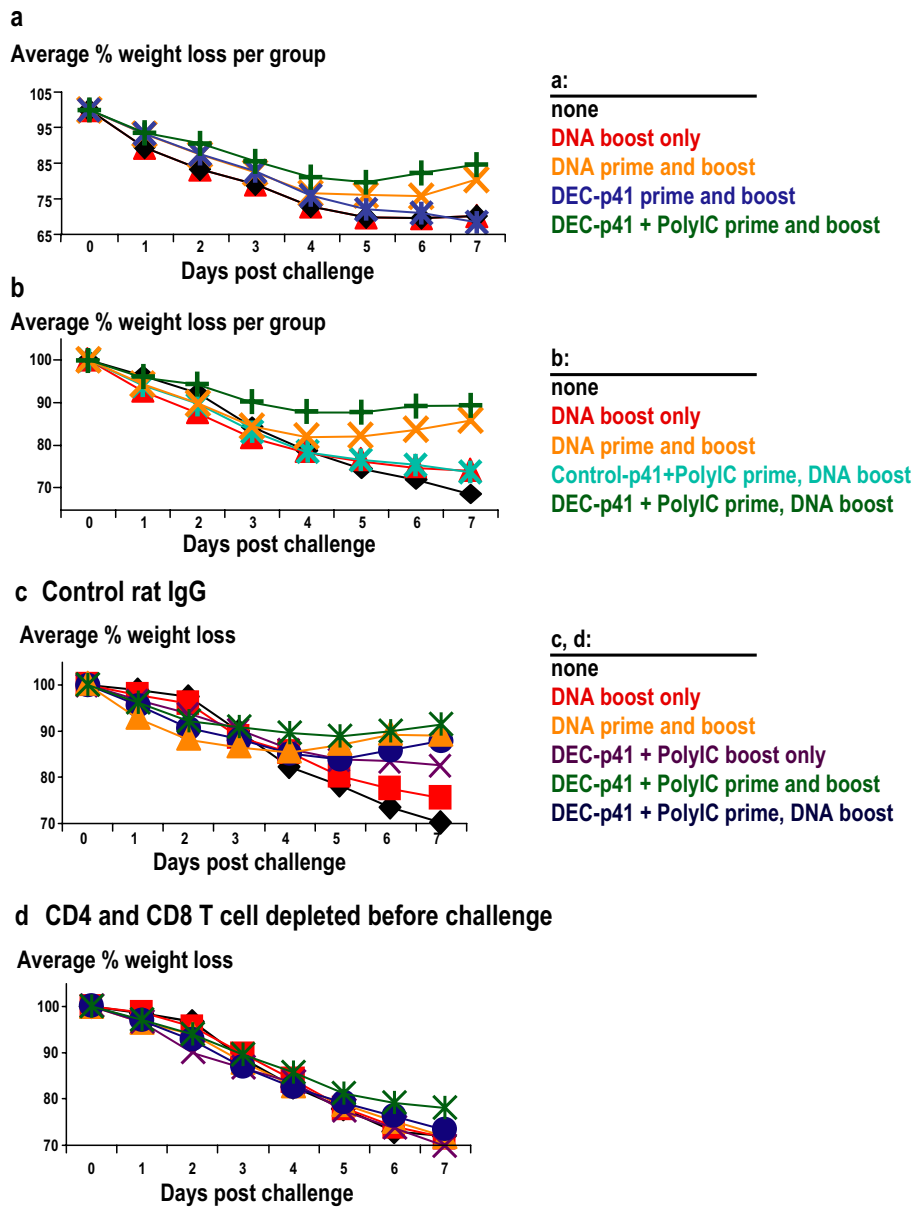

**Fig. S1.** Complementary prime boost provide protection from weight loss after airway challenge by recombinant vaccinia gag virus. Female CxB6 F<sub>1</sub> mice are vaccinated and challenged as described in the legend of Fig. 1. Weight loss was monitored daily for 7 days after challenge. (A and B) Body weight lost data for Fig. 1 with each group displayed in the corresponding color of its mean lung virus titer as shown in the bar graphs. (C and D) Weight lost data corresponding to Fig. 2.
